# Supplementary material for: A cancer stem cell model as the point of origin of cancer-associated fibroblasts in tumor microenvironment
Source: PubMed Central journal article supplement (PMC5533745; doi:10.1038/s41598-017-07144-5), 2017-07-28
Supplement: 41598_2017_7144_MOESM1_ESM.pdf [file 41598_2017_7144_MOESM1_ESM.pdf]

## **A cancer stem cell model as the point of origin of cancer-associated fibroblasts in tumor microenvironment**

Neha Nair<sup>1</sup>, Anna Sanchez Calle<sup>1</sup>, Maram Hussein Zahra<sup>2</sup>, Marta Preito-Villa<sup>3</sup>, Aung Ko Ko Oo<sup>1</sup>, Laura Hurley<sup>4</sup>, Arun Vaidyanath<sup>1</sup>, Akimasa Seno<sup>1</sup>, Junko Masuda<sup>1</sup>, Yoshiaki Iwasaki<sup>5</sup>, Hiromi Tanaka<sup>6</sup>, Tomonari Kasai<sup>1</sup> and Masaharu Seno<sup>1</sup>

1. Nano-biotechnology, Department of Medical Bioengineering, Okayama University, 3.1.1 Tsushima-Naka, Kita-ku, Okayama, 700-8350 Japan
2. Menoufia University, Faculty of Science, Chemistry Department, Shebib El-Koam, 32511 Egypt
3. National Cancer Research Centre, 5-1-1, Tsukiji, Chuo-ku, Tokyo, 104-0045 Japan
4. Cancer Biology Graduate Program, School of Medicine, Wayne State University, 10E warren Avenue, Suite 2215 Detroit, MI, 48201 USA
5. Department of Gastroenterology and Hepatology, Okayama University, 700-8558 Japan
6. Department of Medical and Molecular Genetics, Indiana University School of Medicine, 975 W. Walnut Street, IB-130, Indianapolis, IN, 460202 USA

## Supplementary Figure 1

a

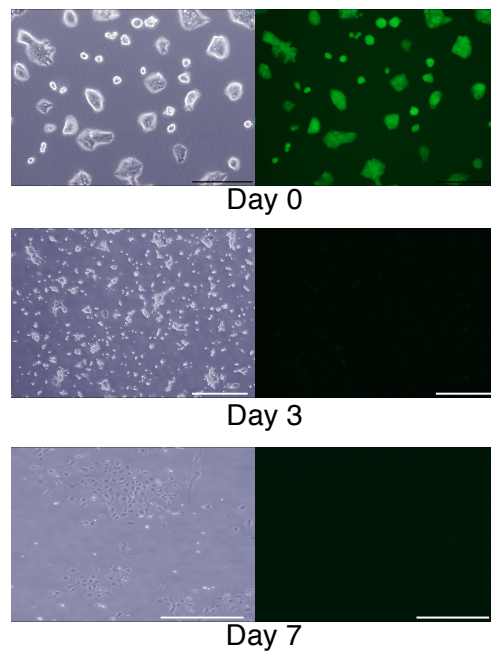

b

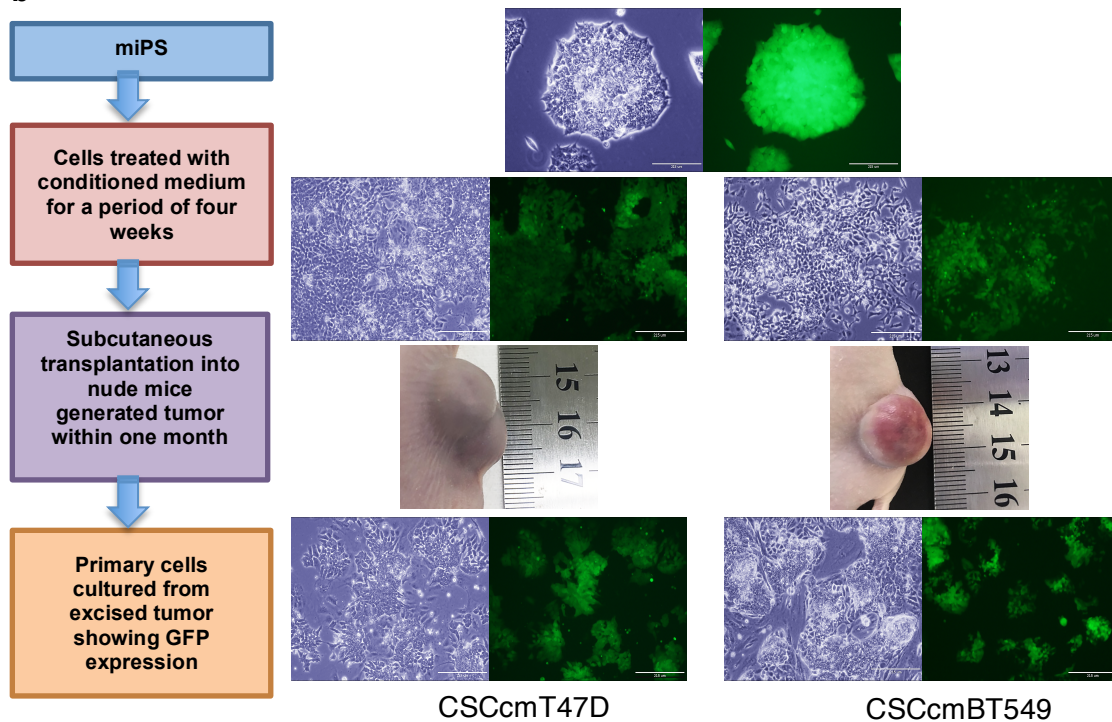

**Supplementary Fig 1:** (a) Representative images of miPS cells in feeder-less condition. Cells could not be maintained without LIF for more than a week and expire with concomitant loss of GFP expression. Scale bars represent 200 $\mu$ m (day 0) and 400 $\mu$ m (day 3&7) (b) Schematic representation of the CSC establishment from miPS cells using the conditioned medium (CM) from T47D and BT549 cell lines. CSCcmT47D and CSCcmBT549 represent primary cells excising tumor from nude mice. Scale bars represent 200  $\mu$ m. Unstained cells in phase contrast and GFP-labeled cells in fluorescence contrast from each identical viewfield are shown side by side.

## Supplementary figure 2

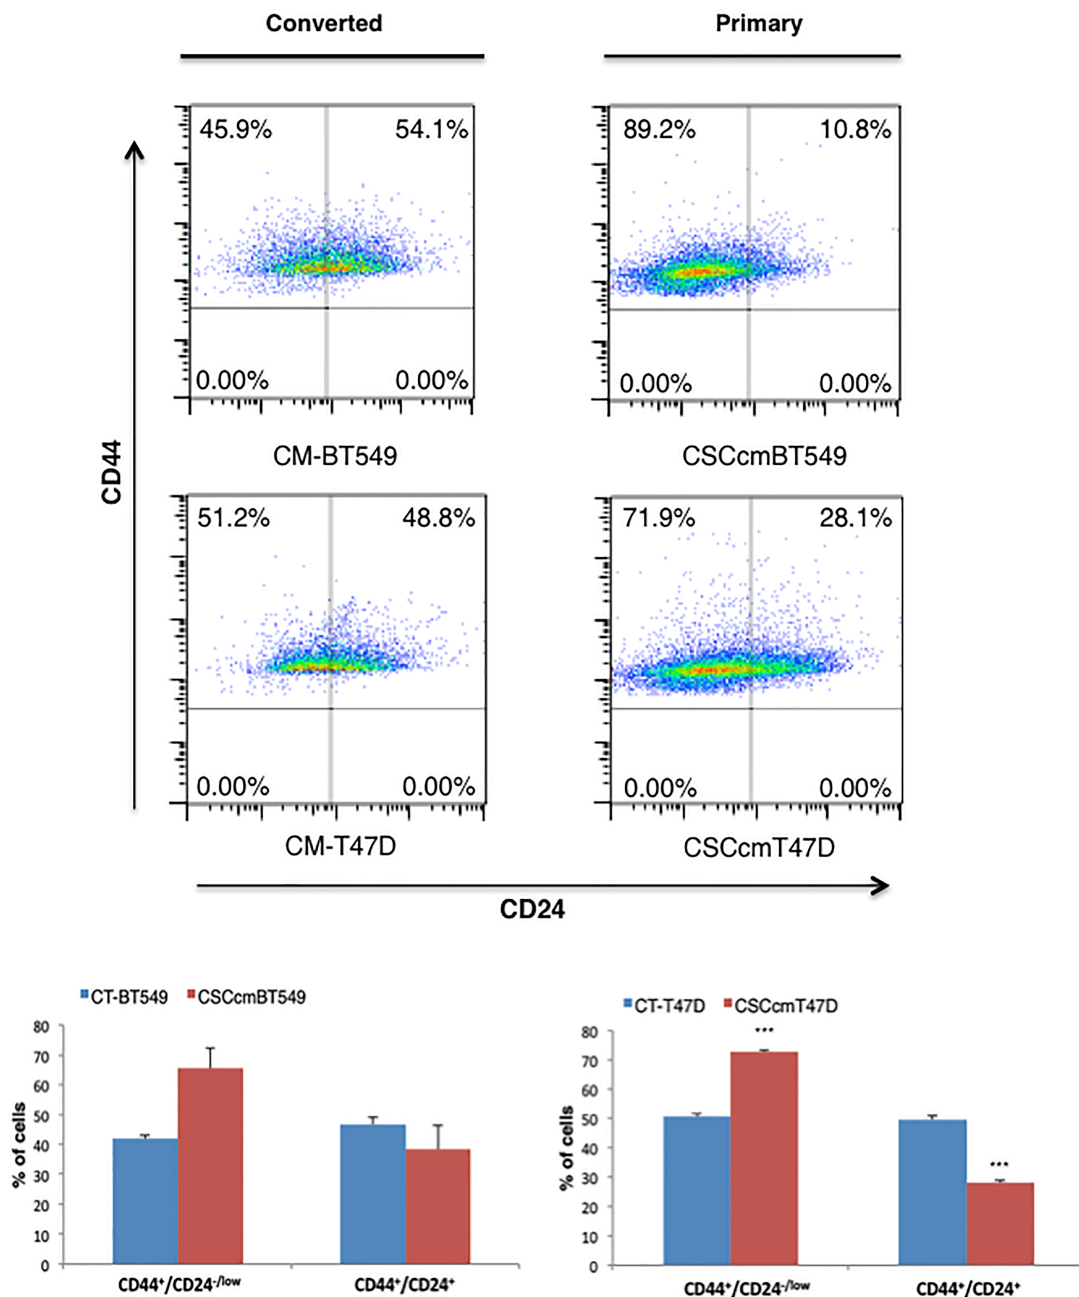

**Supplementary Fig 2:** Representative plots and corresponding graphs of flow cytometer analysis demonstrating percentage of CD24<sup>-/low</sup> and CD24<sup>+</sup> in CD44<sup>+</sup> cells in 1) CT-BT549, 2) CSCcmBT549, 3) CT-T47D and 4) CSCcmT47D. Flow cytometer plots are representative of three independent experiments. Data is presented as mean  $\pm$  standard deviation and analyzed using unpaired two-tailed student's *t*-test. The level of significance was set as \*\*\* $P < 0.001$ , \*\* $P < 0.01$

### Supplementary figure 3

a

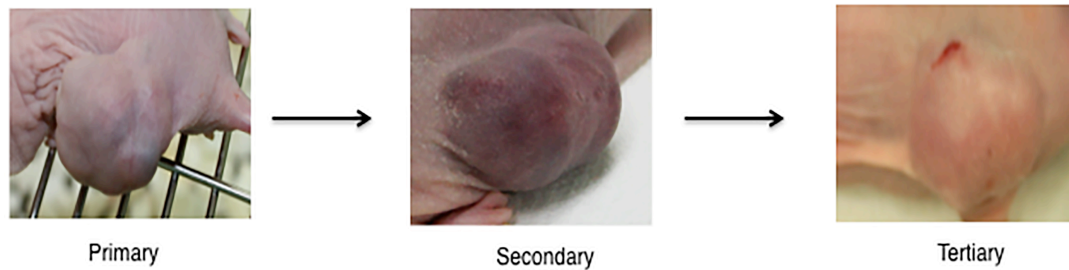

b

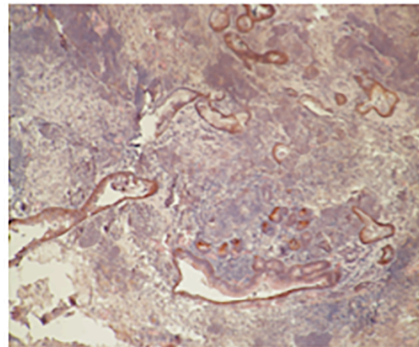

CSCcmBT549 injected into third mammary gland of Balb/c nude mice

**Supplementary Fig 3:** (a) Representative photographic images of serial subcutaneous tumors formed from CSCcmT47D cells in balb/c nude mice (b) Micrograph of primary orthotopic mammary tumor section formed by CSCcmBT549 stained with Her 2 receptor antibody showing Her2 overexpression. Scale bar represents 300 $\mu$ m.

## Supplementary Figure 4

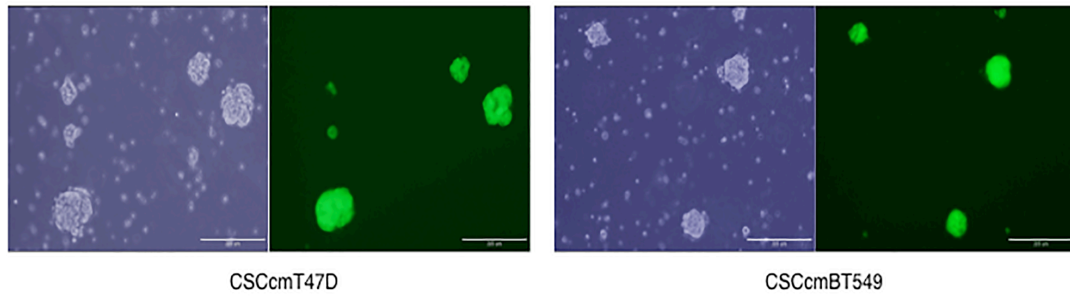

**Supplementary Fig 4:** Representative images of secondary spheres formed by CSCcmT47D and CSCcmBT549 primary spheres dissociated and cultured in serum free medium. Unstained cells in phase contrast and GFP-labeled cells in fluorescence contrast from each identical viewfield are shown side by side. Scale bars represent 200 $\mu$ m

## Supplementary Figure 5

a

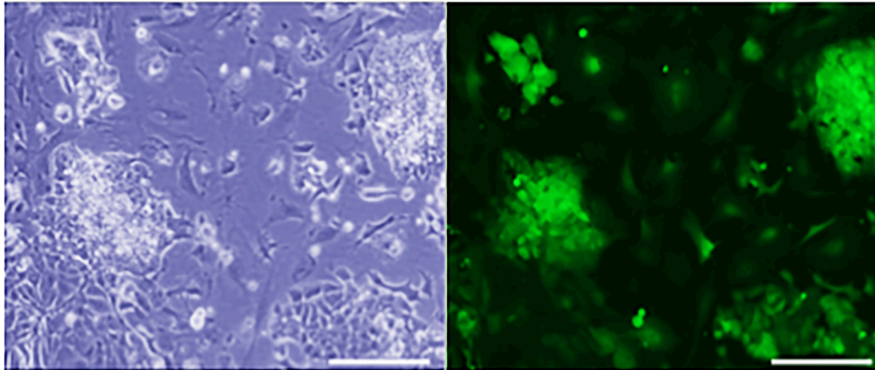

mESBT549 primary culture

b

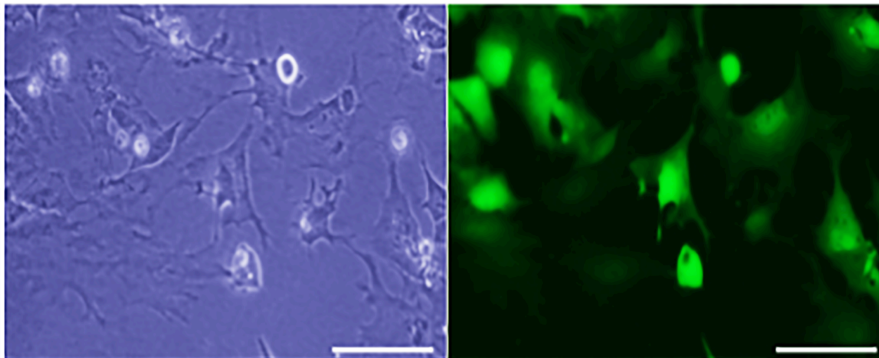

MACS separated fibroblast-like cells

**Supplementary Fig 5:** (a) Representative images of mESBT549 primary cells cultured from excised tumors. Scale bars represent 200 $\mu$ m (b) Representative images of fibroblasts separated from primary culture of mESBT549 using fibroblast specific magnetic activated cell sorting (MACS). Scale bars represent 100 $\mu$ m. Unstained cells in phase contrast and GFP-labeled cells in fluorescence contrast from each identical viewfield are shown side by side.

## Supplementary Figure 6

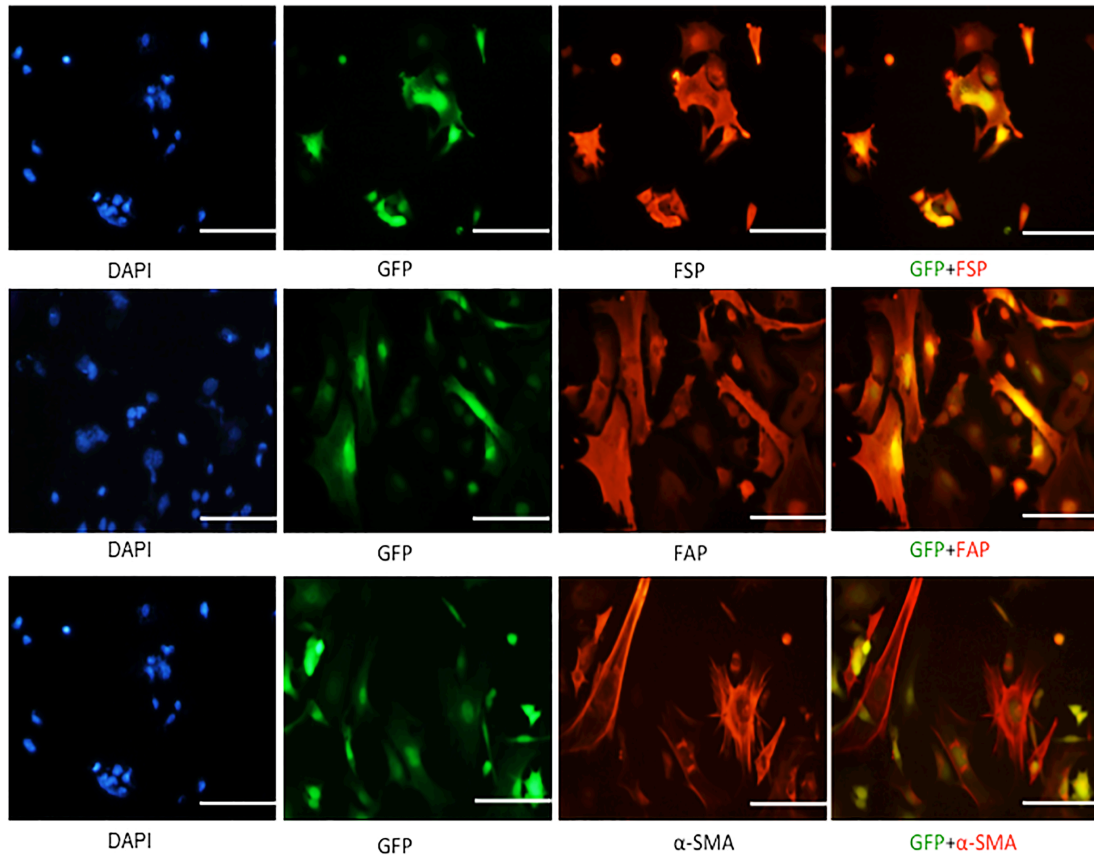

**Supplementary Fig 6:** MACS separated fibroblast-like cells were stained separately with CAF markers: anti-rabbit FSP1, anti-rabbit  $\alpha$ -SMA and anti-rabbit FAP followed by staining with secondary antibodies: Alexa Fluor 555 and Alexa Fluor 488. The nuclei were counterstained with DAPI (*blue*). Scale bars represent 50 $\mu$ m.

## Supplementary Figure 7

a

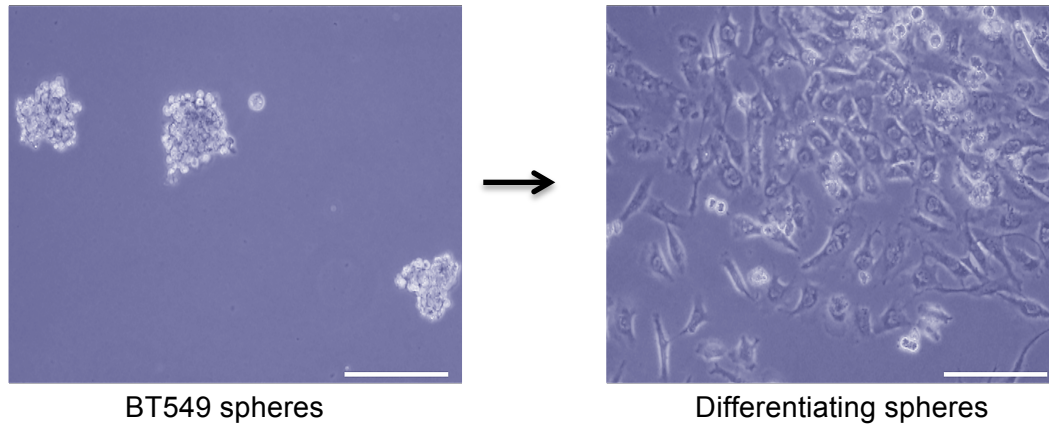

b

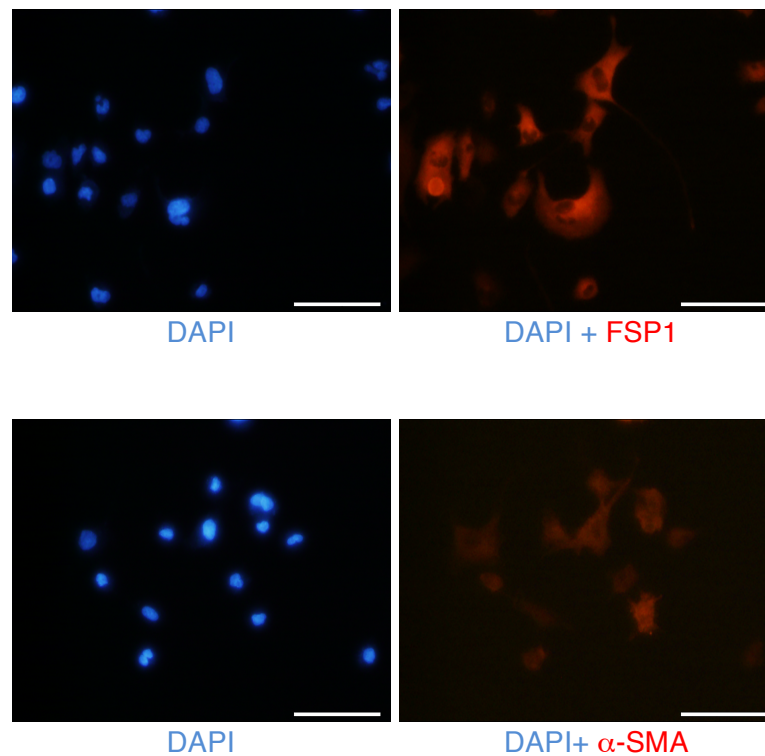

**Supplementary Fig 7:** (a) Representative brightfield images of breast cancer cell line, BT549 spheres and cells differentiated from spheres in presence of BT-549 conditioned medium collected in low serum. Scale bars represent 200 $\mu$ m. (b) Cells differentiated from spheres were stained separately with anti-rabbit FSP1 and anti-rabbit  $\alpha$ -SMA primary antibodies. Scale bars represent 200 $\mu$ m.



## Supplementary figure 8

a

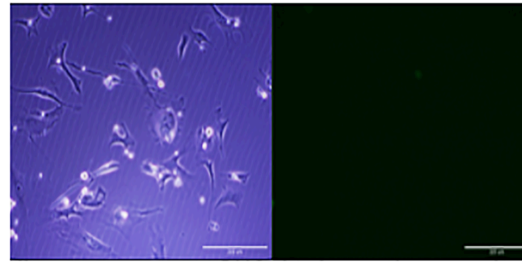

CSCcmT47D-CAFLC

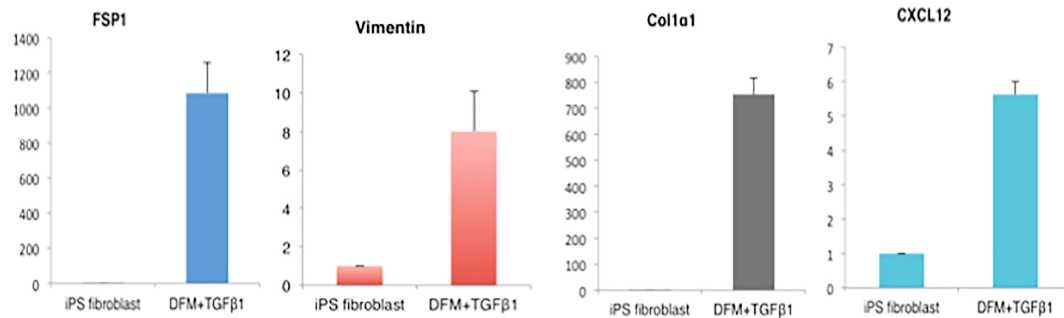

b

**Supplementary Fig. 8:** (a) Unstained cells showing morphology of cells differentiating from CSCcmT47D sphere treated with 10ng/ml of pure TGFβ1 growth factor in DMEM medium containing knock serum replacement medium. Phase contrast and fluorescence contrast images from identical viewfield were shown side by side. Scale bars represent 200μm (b) RT-qPCR analysis for CAF markers namely FSP1, Vimentin, Col1α1 and CXCL12 in CSCcmT47D-CAFLc in comparison with miPS-fibroblast.

## Supplementary figure 9

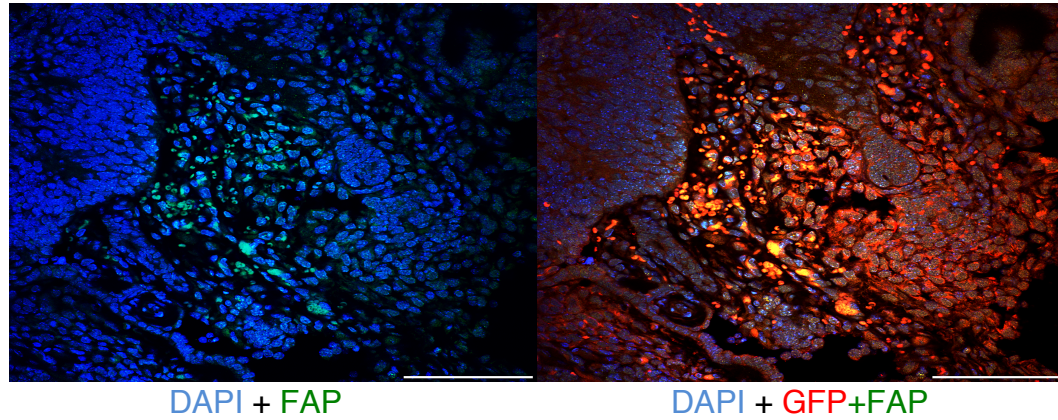

**Supplementary Fig. 9:** Representative images of Immunofluorescent stained CSCcmT47D sphere tumor with anti-rabbit fibroblast activation protein (Alexa fluor 488 secondary antibody-green), green fluorescent protein (Alexa fluor 555 conjugated with GFP antibody-red) antibodies. Nuclei were counterstained with DAPI (blue). Scale bars represent 50 $\mu$ m

## Supplementary figure 10

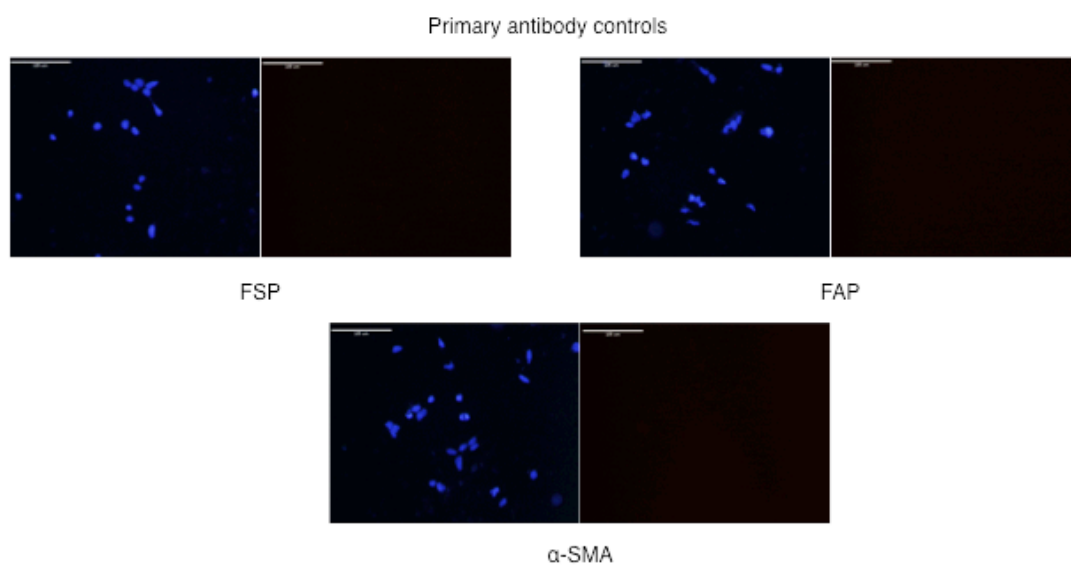

**Supplementary Fig 10:** Immunofluorescent analysis of CSCcmT47Dcm and CSCcmBT549 sphere differentiated CAF-like cells for primary antibody controls. Scale bars represent 100 $\mu$ m.

## Supplementary Figure 11

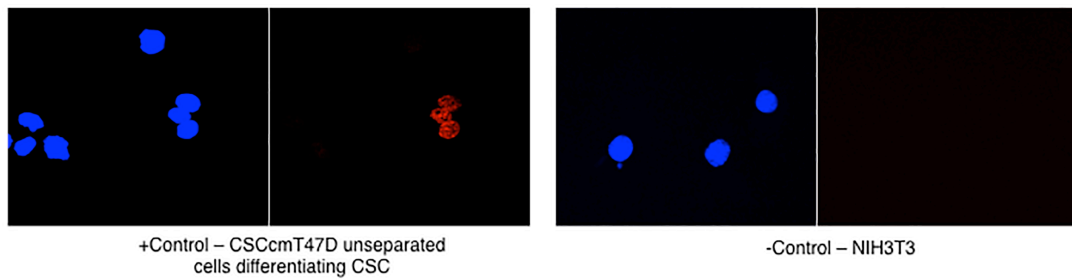

**Supplementary Fig 11:** FISH assay positive control (sphere differentiated cells of CSCcmT47D before fibroblast separation) and negative control (NIH3T3). Scale bars represent 10µm.

## Supplementary Figure 12

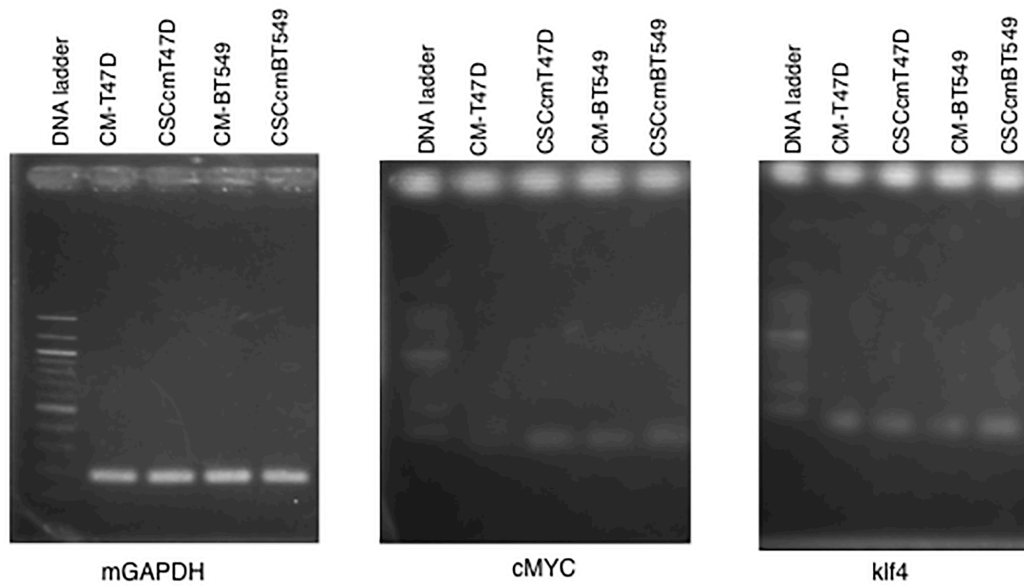

**Supplementary Fig. 12:** Agarose gel images showing amplification products for house keeping gene GAPDH, Tg-cMYC and Tg-klf4 in CM treated miPS cells (CM-T47D, CM-BT549) after four weeks and primary cells; CSCcmT47D and CSCcmBT549 generated from subcutaneous tumors.

## Supplementary Table 1

List of mouse qPCR primers used in this study.

| Gene            | Forward Primer (5'-3')   | Reverse Primer (5'-3')    |
|-----------------|--------------------------|---------------------------|
| CD133           | CCTTGTTGGTTCTTACGTTTGTG  | CGTTGACGACATTCTCAAGCTG    |
| EpCam           | CTGGCGTCTAAATGCTTGGC     | CCTTGTCGGTTCTTCGGACTC     |
| Oct3/4          | TCTTTCCACCAGGCCCCCGGCTC  | TGCGGGCGGACATGGGGAGATCC   |
| Sox2            | TAGAGCTAGACTCCGGGCGATGA  | TTGCCTTAAACAAGACCACGAAA   |
| Tg klf4         | GCGAACTCACACAGGCGAGAAACC | TTATCGTTCGACCACTGTGCTGCTG |
| Tg c-Myc        | CAGAGGAGGAACGAGCTGAAGCGC | TTATCGTTCGACCACTGTGCTGCTG |
| FSP1            | CAGGCAAAGAGGGTGACAAG     | TGCAGGACAGGAAGACACAG      |
| $\alpha$ SMA    | GGAGAAGCCCAGCCAGTCGC     | AGCCGGCCTTACAGAGCCCA      |
| Vimentin        | CGGCTGCGAGAGAAATTGC      | CCACTTTCCGTTCAAGGTCAAG    |
| Col1 $\alpha$ 1 | GTCCTAGTCGATGGCTGCTC     | CAATGTCCAGAGGTGCAATG      |
| PDGF $\alpha$   | ATGAGAGTGAGATCGAAGGCA    | CGGCAAGGTATGATGGCAGAG     |
| TGF $\beta$ 1   | TGATACGCCTGAGTGGCTGTCT   | CACAAGAGCAGTGAGCGCTGAA    |
| CXCL12          | GAGCCAACGTCAAGCATCTG     | CGGGTCAATGCACACTTGTC      |
